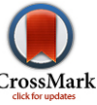

## Correction

# Correction: Quantitative Characterization of Cellular Membrane-Receptor Heterogeneity through Statistical and Computational Modeling

The *PLOS ONE* Staff

## Notice of Republication

This article was republished on August 13, 2014, to correct errors in the References section that were introduced in the typesetting process. The originally published, uncorrected article and the republished, corrected article are provided here for reference.

## Supporting Information

**File S1.** Originally published, uncorrected article.

**File S2.** Republished corrected article.

## Reference

1. Weddell JC, Imoukhuede PI (2014) Quantitative Characterization of Cellular Membrane-Receptor Heterogeneity through Statistical and Computational Modeling. *PLoS ONE* 9(5): e97271. doi:10.1371/journal.pone.0097271

**Citation:** The *PLOS ONE* Staff (2014) Correction: Quantitative Characterization of Cellular Membrane-Receptor Heterogeneity through Statistical and Computational Modeling. *PLoS ONE* 9(8): e107095. doi:10.1371/journal.pone.0107095

**Published** August 28, 2014

**Copyright:** © 2014 The *PLOS ONE* Staff. This is an open-access article distributed under the terms of the Creative Commons Attribution License, which permits unrestricted use, distribution, and reproduction in any medium, provided the original author and source are credited.
